# Supplementary material for: Spatial visualization of comprehensive brain neurotransmitter systems and neuroactive substances by selective in situ chemical derivatization mass spectrometry imaging
Source: Springer Nature journal article supplement (doi:10.1038/s41596-021-00538-w), 2021-06-02
Supplement: MOESM3 [file 41596_2021_538_MOESM3_ESM18.xlsx]

## Sheet: MassAccuracy
Experiment	Compound	Observed mass	Theoretical mass	Mass accuracy (ppm)
Figure 2	Dopamine	368.164	368.165	-0.0135809
DPP and FMP-10	Dopamine	674.28	674.28	0.741532
	3-MT	382.18	382.18	0.117746
	3-MT	435.207	435.207	-0.0114888
	5-HT	391.18	391.18	0.02812
	5-HT	444.207	444.207	0.137323
	Norepinephrine	384.159	384.159	-0.0494586
	Norepinephrine	690.275	690.275	-0.0246279
	GABA	318.149	318.149	0.141443
	GABA	371.175	371.175	-0.0134707
Figure 3	DOPAC	689.241	689.243	-3.6025
50µm FMP-10	3-MT	435.206	435.207	-0.930592
	5-HIAA	459.17	459.17	-0.912515
	5-HT	444.207	444.207	0.362444
	Creatine	399.182	399.182	0.117741
	Creatinine	381.171	381.171	0.0314819
	DOPAL	420.159	420.159	-0.047601
	DOPAL (Double)	673.246	673.249	-3.22021
	Dopamine	674.277	674.28	-3.41105
	GABA	353.165	353.165	1.30251
	Histamine	379.192	379.192	-0.0606553
	Histidine	423.181	423.182	-0.361547
	HVA	450.17	450.17	0.0333207
	Lycine	414.218	414.218	-0.00965676
	Norepinephrine	690.273	690.275	-3.35663
	Spermidine	413.27	413.27	0.0629129
	Taurine	393.127	393.127	-0.101748
	DOPEG	438.17	438.17	0.0342333
	Epinephrine	704.289	704.291	-2.50891
	5-HIAL	443.175	443.175	-1.1395
	5-HTOL	445.191	445.191	0.774948
	tocopherol	698.492	698.493	-1.65642
	Arginine	442.223	442.224	-1.02211
Figure 4	Dopamine	674.28	674.28	0.148306
20µm FMP-10	3-MT	435.207	435.207	0.677839
	HVA	450.17	450.17	0.477597
	Norepinephrine	690.274	690.275	-1.47333
	DOPAL	673.249	673.249	-0.101003
	5HT	444.207	444.207	0.587564
	5HIAL	443.175	443.175	0.214362
	5HIAA	459.171	459.17	0.829757
	GABA	353.165	353.165	1.30251
	Taurine	393.127	393.127	0.915735
	Tocopherol	698.492	698.493	-1.51326
Figure 5	Dopamine	368.164	368.165	-0.285199
50, 20µm DPP	3-MT	382.18	382.18	0.379402
	GABA	318.149	318.149	0.141443
Figure 6	Dopamine	421.191	421.191	-0.0830977
DESI MSI	GABA	371.175	371.175	-0.417592
	Tocopherol	698.493	698.493	0.0472446

## Sheet: RedPhosMassRefList
m/z
30.9738
92.9213
154.869
216.816
278.764
340.711
402.659
464.606
526.554
588.501
650.449
712.397
774.344
836.292
898.239
960.187
1022.13
1084.08
1146.03
1207.98
1269.92
1331.87
1393.82
1455.77
1517.71
1579.66
1641.61
1703.56
1765.5
1827.45
1889.4
1951.35
2013.29
2075.24
2137.19
2199.14
2261.08
2323.03
2384.98
2446.93
2508.87
2570.82
2632.77
2694.72
2756.66
2818.61
2880.56
2942.51
3004.45
3066.4
3128.35
3190.3
3252.25
3314.19
3376.14
3438.09
3500.04
3561.98
3623.93
3685.88
3747.83
3809.77
3871.72
3933.67
3995.62
4057.56
4119.51
4181.46
4243.41
4305.35
4367.3
4429.25
4491.2
4553.14
4615.09
4677.04
4738.99
4800.93
4862.88
4924.83
4986.78

## Sheet: LOD HVA
	IS normalization												RMS normalization
	pmol/mg	AVG [a.u.]	SD											pmol/mg	AVG	SD
	392.47	14.6341	0.646472											392.47	5.58393e+06	430419
	98.1174	4.02418	0.310328											98.1174	1.64874e+06	200162
	24.5294	0.951655	0.054854											24.5294	384246	45002.9
	6.13234	0.242839	0.0125925											6.13234	91124	2345.22
	1.53309	0.102054	0.002267											1.53309	38002.4	1465.43
	0	0.0818505	0.0267755											0	15203.8	1259.17
	LINEST													LINEST
slope	0.0371994	0.0982495	intercept										slope	14207	55680.3	intercept
SE of slope	0.000444448	0.0735471	SE of intercept										SE of slope	318.447	52696.5	SE of intercept
R2	0.999429	0.153158	SE of y										R2	0.997994	109738	SE of y
	7005.34	4												1990.36	4
	164.327	0.0938294												2.39686e+13	4.81694e+10
	LOD:	6.52445												LOD:	12.2403

## Sheet: LOD DA
DA single derivatized - IS normalization													DA single derivatized - RMS normalization
	pmol/mg	AVG [a.u.]	SD										pmol/mg	AVG [a.u.]	SD
	466.755	44.2502	1.91956										466.755	3.90916e+06	316683
	116.689	12.4211	0.686326										116.689	1.86891e+06	104008
	29.1722	3.13468	0.12005										29.1722	521149	22176.3
	7.29305	0.733694	0.117133										7.29305	135772	22922.5
	1.82326	0.170814	0.04542										1.82326	37589.8	2526.08
	0	0.019976	0.002874										0	4357.31	1666.86
	LINEST												LINEST
slope	0.106551	-0.00654297	intercept									slope	15920.8	20084	intercept
SE of slope	0.000344504	0.0185673	SE of intercept									SE of slope	248.547	13395.7	SE of intercept
R2	0.999969	0.033965	SE of y									R2	0.999269	24504.5	SE of y
	95659.2	3											4103.09	3
	110.354	0.00346086											2.46379e+12	1.80142e+09
	LOD:	0.57505											LOD:	2.7766
DA double derivatized - IS normalization													DA double derivatized - RMS normalization
	pmol/mg	AVG [a.u.]	SD										pmol/mg	AVG [a.u.]	SD
	466.755	46.3579	2.8945										466.755	5.30538e+07	4.97647e+06
	116.689	12.7627	0.865826										116.689	3.09356e+07	2.03853e+06
	29.1722	3.0911	0.110241										29.1722	9.02359e+06	540564
	7.29305	0.889438	0.037703										7.29305	2.53816e+06	305584
	1.82326	0.298918	0.037835										1.82326	958214	94748.4
	0	0.143929	0.0029285										0	369643	18495.4
	LINEST												LINEST
slope	0.108411	0.0769644	intercept									slope	260792	681679	intercept
SE of slope	0.000994488	0.0535987	SE of intercept									SE of slope	4932.12	265821	SE of intercept
R2	0.999748	0.0980476	SE of y									R2	0.998928	486263	SE of y
	11883.6	3											2795.9	3
	114.241	0.02884											6.61095e+14	7.09356e+11
	LOD:	1.63153											LOD:	3.36363

## Sheet: LOD GABA-d6
DPP - RMS normalization													FMP-10 RMS normalization
GABA-d6													GABA-H2O-d6
	Amount (pmol/mg)	AVG [a.u.]											Amount (pmol/mg)	AVG [a.u.]
	68.4884	418949											4383.26	658414
	17.1221	93644.5											1095.81	214537
	4.28053	69655.1											273.954	95638.8
	1.07013	42114.2											68.4884	50593.4
	0	23848.4											17.1221	30493.9
													4.28053	24863.8
													1.07013	25307.8
													0	31948.8
	LINEST
slope	5628.58	27245.8	intercept										LINEST
SE of slope	368.255	11649.1	SE of intercept									slope	143.277	36811.2	intercept
R2	0.987321	21309.6	SE of y									SE of slope	3.60301	5766.75	SE of intercept	intercept
	233.615	3										R2	0.99622	14512.9	SE of y	SE of intercept
	1.06084e+11	1.36229e+09											1581.33	6		SE of y
													3.33067e+11	1.26375e+09
	LOD:	6.82979
													LOD:	132.822

## Sheet: LOD DA-d4
DPP - RMS normalization													FMP-10 RMS normalization
DA-d4													DA-d4	single	double
	Amount (pmol/mg)	AVG [a.u.]											Amount (pmol/mg)	AVG [a.u.]	AVG [a.u.]
	154.826	1.73376e+06											38.7065	160958	2.8645e+06
	38.7065	514860											9.67663	69137	1.13636e+06
	9.67663	178529											2.49892	39201.4	389279
	0.73795	61813.5											0.604789	33324	205837
	0	22853.4											0	25790.5	29159
	LINEST												LINEST
slope	10883.2	58441.5	intercept									slope	3403.17	30638.4	intercept
SE of slope	234.18	16744.6	SE of intercept									SE of slope	133.211	2381.79	SE of intercept
R2	0.998613	30752.2	SE of y									R2	0.995424	4353.9	SE of y
	2159.82	3											652.661	3
	2.04254e+12	2.83709e+09											1.23722e+10	5.68694e+07
	LOD:	5.07726										DA-d4 single	LOD:	2.30958
													LINEST
												slope	70527.1	198784	intercept
												SE of slope	5570.37	99597.3	SE of intercept
												R2	0.981629	182064	SE of y
													160.304	3
													5.31362e+12	9.94414e+10
												DA-d4 double	LOD:	4.66021

## Sheet: LOD 3MT-d4
DPP - RMS normalization													FMP-10 RMS normalization
3-MT-d4													3-MT-d4	single	double
	Amount (pmol/mg)	AVG [a.u.]											Amount (pmol/mg)	AVG [a.u.]
	144.345	641772											148.245	2.94411e+06	1.81848e+06
	9.02155	66023.6											9.26529	269714	170010
	2.25539	42347.9											2.31632	114088	82065.2
	0.563847	45428											0.579081	84318.9	56708.7
	0	25843.5											0	26526.6	29892.2
	LINEST												LINEST
slope	4219.46	32479.3	intercept									slope	19438.6	64139.3	intercept
SE of slope	60.5353	3915.87	SE of intercept									SE of slope	206.759	13736	SE of intercept
R2	0.999383	7667.57	SE of y									R2	0.999661	26896.2	SE of y
	4858.42	3											8839.01	3
	2.85634e+11	1.76375e+08											6.39418e+12	2.17021e+09
	LOD:	3.06257										DA single	LOD:	2.33189
													LINEST
												slope	11947.4	48146.4	intercept
												SE of slope	99.2699	6594.99	SE of intercept
												R2	0.999793	12913.5	SE of y
													14484.7	3
													2.41544e+12	5.00276e+08
												DA double	LOD:	1.82162
